# Supplementary material for: Gatifloxacin hydrochloride confers broad-spectrum antibacterial activity against phytopathogenic bacteria
Source: Front Microbiol. 2024 Dec 2;15:1504243. doi: 10.3389/fmicb.2024.1504243 (PMC11648225; doi:10.3389/fmicb.2024.1504243)
Supplement: Supplementary file 1 [file Table_1.xlsx]

## Sheet: Sheet2
Number	Name	Synonyms	CAS	SMILES	Formula	MolWt	Pathways	Target	Receptor	Bioactivity	Reference	Solvent
	DMSO
1	Terphenyllin	N/A	52452-60-5	OC=1C=CC(=CC1)C2=CC(OC)=C(C(O)=C2OC)C3=CC=C(O)C=C3	C20H18O5	338.35	Metabolism	Glucosidase	α-glucosidase	Terphenyllin has α-glucosidase inhibitory activity, and is a natural product isolated from the coral derived fungus Aspergillus candidus.	Zhang XQ, et al. Design, semisynthesis, α-glucosidase inhibitory, cytotoxic, and antibacterial activities of p-terphenyl derivatives. Eur J Med Chem. 2018 Feb 25;146:232-244.	DMSO
2	Indolelactic acid	N/A	1821-52-9	O=C(O)C(O)CC1=CNC=2C=CC=CC21	C11H11NO3	205.21	Metabolism	Endogenous Metabolite	Endogenous Metabolite	Indolelactic acid is a metabolite of tryptophan in Azotobacter vinelandii cultures.	Francisco García-Tabares, et al. Production of 3-indoleacetic acid and 3-indolelactic acid in Azotobacter vinelandii cultures supplemented with tryptophan. Appl Microbiol Biotechnol.1987 Mar, 25 (6):502–506.	DMSO
3	Antrodin A	camphorataanhydride A	656830-24-9	CC(C)CC1=C(C(=O)OC1=O)c1ccc(OCC=C(C)C)cc1	C19H22O4	314.381	Others	Others	Others	Antrodin A (AdA) is one of the main active ingredients in the solid-state fermented A. camphorata mycelium. It protects the liver from alcohol damage by improving the antioxidant and anti-inflammatory capacity of the liver and maintaining the stability of the intestinal flora.	Yi Z W , Xia Y J , Liu X F , et al. Antrodin A from mycelium of Antrodia camphorata alleviates acute alcoholic liver injury and modulates intestinal flora dysbiosis in mice[J]. Journal of Ethnopharmacology, 2020:112681.	DMSO
4	N-Acetyl-L-tryptophan	N-acetyltryptophan	1218-34-4	CC(=O)N[C@@H](Cc1c[nH]c2ccccc12)C(O)=O	C13H14N2O3	246.266	GPCR/G Protein;Metabolism;Neuroscience	Endogenous Metabolite;Neurokinin receptor	Endogenous Metabolite; Human Endogenous Metabolite; NK1	N-Acetyl-L-tryptophan is an inhibitor of neurokinin 1 receptor (NK1-receptor, NK1R).	Fernandes J , Mudgal J , Rao C M , et al. N-acetyl-L-tryptophan, a substance-P receptor antagonist attenuates aluminum-induced spatial memory deficit in rats[J]. Toxicology Mechanisms & Methods, 2018, 28(5):328.;Thornton E , Hassall M M , Corrigan F , et al. The NK1 receptor antagonist N-acetyl-l-tryptophan reduces dyskinesia in a hemi-parkinsonian rodent model[J]. Parkinsonism & Related Disorder…	DMSO
5	Colistin methanesulfonate sodium salt	Colistin Methanesulfonate (sodium salt)	8068-28-8	[Na+].[Na+].[Na+].[Na+].[Na+].[Na+].[Na+].[Na+].[Na+].[Na+].CC(C)CCCCC(=O)NC(CCNCS([O-])(=O)=O)C(=O)NC(C(C)O)C(=O)NC(CCNCS([O-])(=O)=O)C(=O)NC1CCNC(=O)C(NC(=O)C(CCNCS([O-])(=O)=O)NC(=O)C(CCNCS([O-])(=O)=O)NC(=O)C(CC(C)C)NC(=O)C(CC(C)C)NC(=O)C(CCNCS([O-])(=O)=O)NC1=O)C(C)O.CCC(C)CCCCC(=O)NC(CCNCS([O-])(=O)=O)C(=O)NC(C(C)O)C(=O)NC(CCNCS([O-])(=O)=O)C(=O)NC1CCNC(=O)C(NC(=O)C(CCNCS([O-])(=O)=O)NC(=O)…	C115H208N32Na10O56S10	3485.59	Immunology/Inflammation;Microbiology/Virology	Antibacterial;Cell wall	Bacterial; cell wall	Colistin is a cyclic polypeptide antibiotic from Bacillus colistinus, composed of Polymyxins E1 and E2.	Jian Li, et al. In Vitro Pharmacodynamic Properties of Colistin and Colistin Methanesulfonate against Pseudomonas aeruginosa Isolates from Patients with Cystic Fibrosis. Antimicrob Agents Chemother. 2001 Mar; 45(3): 781–785. ;Falagas ME, et al. Clin Infect Dis, 2005, 40(9), 1333-1341.;Evans ME, et al. Ann Pharmacother, 1999, 33(9), 960-967.;Ozbek B, et al. Chemotherapy, 2010, 56(6), 466-471.	DMSO
6	Glycogen, Mussel	Glycogen	9005-79-2	OC[C@H]1O[C@H](OC[C@H]2O[C@H](O[C@H]3[C@H](O)[C@@H](O)[C@@H](O)O[C@@H]3CO)[C@H](O)[C@@H](O)[C@@H]2O[C@H]2O[C@H](CO)[C@@H](O)[C@H](O)[C@H]2O)[C@H](O)[C@@H](O)[C@@H]1O	C24H42O21	666.579	Metabolism	Endogenous Metabolite	Endogenous Metabolite; Human Endogenous Metabolite	Glycogen is a glycolytic intermediate and high-energy phosphate that ACTS as a form of energy storage for humans, animals, fungi and bacteria.	Harris RC, et al. Glycogen, glycolytic intermediates and high-energy phosphates determined in biopsy samples of musculus quadriceps femoris of man at rest. Methods and variance of values. Scand J Clin Lab Invest. 1974 Apr;33(2):109-20.	DMSO
7	Tacrolimus monohydrate	FR900506;FR 900506;FK-506;FK 506;LCP-Tacro;Tacrolimus hydrate;Prograf	109581-93-3	O(C)[C@@H]1[C@@]2(O[C@](O)([C@H](C)C1)C(=O)C(=O)N3[C@](C(=O)O[C@H](\C(=C\[C@H]4C[C@@H](OC)[C@H](O)CC4)\C)[C@H](C)[C@@H](O)CC(=O)[C@H](CC=C)/C=C(\C)/C[C@H](C)C[C@@H]2OC)(CCCC3)[H])[H].O	C44H71NO13	822.03	Autophagy;Metabolism;Microbiology/Virology;Others	Others;Autophagy;Antibacterial;Antibiotic;Phosphatase	Antibiotic; Autophagy; BacteriaL; FKBP; Phosphatase	Tacrolimus hydrate is a macrolide from the culture broth of a strain of Streptomyces tsukubaensis, binds to FK506 binding protein (FKBP) to form a complex. Tacrolimus inhibits calcineurin phosphatase, which inhibits T-lymphocyte signal transduction and IL-2 transcription. Immunosuppressive properties. It prevents the activation of T-lymphocytes in response to antigenic or mitogenic stimulation in…	Shin MH, Song GW, Lee SG, et al. Once-daily, prolonged-release tacrolimus versus twice-daily, immediate-release tacrolimus in de novo living-donor liver transplantation: a Phase 4, randomized, open-label, comparative, single-center study. Clin Transplant. 2018 Aug 11:e13376. doi: 10.1111/ctr.13376. [Epub ahead of print] PubMed PMID: 30098071.;Kumar A, Singh N. Calcineurin Inhibition and Protein K…	DMSO
8	Lasalocid sodium	Ionophore X-537A sodium;Lasalocid-A sodium;Antibiotic X-537A sodium	25999-20-6	C(C)[C@@]1(O[C@]([C@H](C([C@H]([C@H]([C@@H](CCC2=C(C(O)=O)C(O)=C(C)C=C2)C)O)C)=O)CC)([C@@H](C)C1)[H])[C@@]3(O[C@@H](C)[C@](CC)(O)CC3)[H].[Na]	C34H54NaO8	613.78	Autophagy;Microbiology/Virology	Antibiotic;Antibacterial;Autophagy	Antibiotic; Autophagy; Bacterial	Lasalocid sodium is a cationic ionophore antibiotic obtained from Streptomyces lasaliensis that, among other effects, dissociates the calcium fluxes in muscle fibers. Lasalocid sodium is used as a coccidiostat, especially in poultry.	Okubo-Kurihara E et al. Modification of plant cell wall structure accompanied by enhancement of saccharification efficiency using a chemical, lasalocid sodium. Sci Rep. 2016 Oct 3;6:34602.	DMSO
9	cyclo(L-Pro-L-Tyr)	N/A	4549-02-4	Oc1ccc(C[C@@H]2NC(=O)[C@@H]3CCCN3C2=O)cc1	C14H16N2O3	260.293	Others	Others	Others	Maculosin is a secondary metabolite of fungi and bacteria.	Puopolo G , Cimmino A , Palmieri M C , et al. Lysobacter capsici AZ78 produces cyclo(L-Pro- L-Tyr), a 2,5-diketopiperazine with toxic activity against sporangia of Phytophthora infestans and Plasmopara viticola[J]. Journal of Applied Microbiology, 2014, 117(4).;Stierle A C , Cardellina J H , Strobel G A . Maculosin, a host-specific phytotoxin for spotted knapweed from Alternaria alternata[J]. Pro…	DMSO
10	3'-Adenylic acid	N/A	84-21-9	O[C@H]1[C@H](N2C=3C(N=C2)=C(N)N=CN3)O[C@H](CO)[C@H]1OP(=O)(O)O	C10H16N5O8P	365.24	Others	Others	Others	3'-Adenylic acid is an agent of bioactive chemical.	Iizuka H, Adachi K, Halprin KM, Levine V. Adenosine and adenine nucleotides stimulation of skin (epidermal) adenylate cyclase. Biochim Biophys Acta. 1976 Oct 22;444(3):685-93. PubMed PMID: 186102.;Yanagawa H, Ogawa Y, Miyakawa A, Egami F. DNase A, a poly(dA) and poly(dT)-specific deoxyribonuclease from Achatina fulica. Purification and characterization. J Biochem. 1981 Nov;90(5):1463-78. PubMed P…	DMSO
11	Canthaxanthin	all-trans-Canthaxanthin;E 161g	514-78-3	C(=C/C(=C/C=C/C(=C/C=C/C=C(/C=C/C=C(/C=C/C=1C(C)(C)CCC(=O)C1C)\C)\C)/C)/C)\C=2C(C)(C)CCC(=O)C2C	C40H52O2	564.84	Immunology/Inflammation;Metabolism;NF-Κb	Reactive Oxygen Species	Reactive Oxygen Species	Canthaxanthin is a red-orange carotenoid that belongs to the xanthophyll group. This naturally occurring pigment is present in bacteria, algae and some fungi.	Tuba, Esatbeyoglu, Gerald, et al. Canthaxanthin: From molecule to function[J]. Molecular Nutrition & Food Research, 2017.	DMSO
12	Polyporenic acid C	N/A	465-18-9	C[C@]12[C@@](C)([C@@]([C@@H](CCC(C(C)C)=C)C(O)=O)([C@H](O)C1)[H])CC=C3C2=CC[C@@]4([C@]3(C)CCC(=O)C4(C)C)[H]	C31H46O4	482.69	Apoptosis;Chromatin/Epigenetic;DNA Damage/DNA Repair;PI3K/Akt/mTOR signaling;Proteases/Proteasome	Apoptosis;PI3K;PARP;Caspase	Apoptosis; Caspase; PARP; PI3K	Polyporenic acid C shows inhibitory activity against human collagenase.	Polyporenic acid C induces caspase-8-mediated apoptosis in human lung cancer A549 cells.Mol Carcinog. 2009 Jun;48(6):498-507.	DMSO
13	Fosfomycin sodium	Fosfomycin Disodium	26016-99-9	[Na+].[Na+].CC1OC1P([O-])([O-])=O	C3H5Na2O4P	182.022	Microbiology/Virology	Antibiotic;Antibacterial	Antibacterial; Antibiotic; Bacterial	Fosfomycin is a bactericidal, low-molecular weight, broad-spectrum antibiotic, with putative activity against several bacteria, including multidrug-resistant Gram-negative bacteria, by irreversibly inhibiting an early stage in cell wall synthesis.	Dijkmans AC, et al. Fosfomycin: Pharmacological, Clinical and Future Perspectives. Antibiotics (Basel). 2017 Oct 31;6(4). pii: E24.	DMSO
14	(Z)-2-decenoic acid	(Z)-dec-2-enoic acid;cis-2-Decenoic acid;cis-dec-2-enoic acid	15790-91-7	C(CCCCCC)/C=C\C(O)=O	C10H18O2	170.25	Others	Others	Others	(Z)-2-decenoic acid is an unsaturated short-chain fatty acid secreted by Pseudomonas aeruginosa. It can induce a dispersion response in biofilms formed by gram-negative and gram-positive bacteria. (Z)-2-decenoic acid can inhibit biofilm development.	David G Davies, et al. A fatty acid messenger is responsible for inducing dispersion in microbial biofilms. J Bacteriol. 2009 Mar;191(5):1393-403.;Gu W, Silverman RB. Synthesis of (S)-2-Boc-Amino-8-(R)-(tert-butyldimethylsilanyloxy) decanoic acid, a Precursor to the Unusual Amino Acid Residue of the Anticancer Agent Microsporin B. Tetrahedron Lett. 2011 Oct 19;52(42):5438-5440.;Naumowicz M, Petel…	DMSO
15	Chloramphenicol succinate sodium	Chloramphenicol sodium succinate	982-57-0	C1=CC(=CC=C1[C@H]([C@@H](CO)NC(=O)C(Cl)Cl)O)[N+](=O)[O-]	C15H15Cl2N2NaO8	445.2	Microbiology/Virology;Others	Others;Antibacterial;Antibiotic	Antibiotic; Bacterial	Chloramphenicol sodium succinate is broad-spectrum antibiotic with antibacterial activity.	Ambrose D P J . Clinical Pharmacokinetics of Chloramphenicol and Chloramphenicol Succinate[J]. Clinical Pharmacokinetics, 1984, 9(3):222-238.;Ambekar C S , Lee J S K , Cheung B M Y , et al. Chloramphenicol succinate, a competitive substrate and inhibitor of succinate dehydrogenase: possible reason for its toxicity[J]. Toxicology in Vitro, 2004, 18(4):0-447.	DMSO
16	Nosiheptide	RP 9671;Multhiomycin	56377-79-8	O=C1SCC2NC(=O)C=3N=C(SC3)C(NC(=O)C=4N=C(SC4)C(=CC)NC(=O)C(NC(=O)C=5N=C(SC5)C=6C=C(O)C(=NC6C=7N=C2SC7)C8=NC(=CS8)C(=O)NC(=C)C(=O)N)C(O)C)CC(O)C(=O)OCC=9C=CC=C%10NC1=C(C%109)C	C51H43N13O12S6	1222.36	Microbiology/Virology	Antibacterial;Antibiotic	Antibiotic; Bacterial	Nosiheptide is a thiopeptide antibiotic produced by Streptomyces actuosus. Nosiheptide has been widely used as a feed additive for animal growth. Nosiheptide inhibits bacterial protein synthesis and bears a unique indole side ring system and regiospecific hydroxyl groups on the characteristic macrocyclic core.	Yu Y, et al. Nosiheptide biosynthesis featuring a unique indole side ring formation on the characteristic thiopeptide framework. ACS Chem Biol. 2009 Oct 16;4(10):855-64.;Haste NM, et al. Activity of the thiopeptide antibiotic nosiheptide against contemporary strains of methicillin-resistant Staphylococcus aureus. J Antibiot (Tokyo). 2012 Dec;65(12):593-8.	DMSO
17	5-deoxy Thymidine	5'-Deoxythymidine;Thymidine, 5'-deoxy-1-[(2R,4S,5R)-4-hydroxy-5-methyloxolan-2-yl]-5-methylpyrimidine-2,4-dione	3458-14-8	C[C@H]1O[C@H](C[C@@H]1O)n1cc(C)c(=O)[nH]c1=O	C10H14N2O4	226.232	Others	Others	Others	5-deoxy Thymidine is a thymidine form which 5' position replaced with hydrogen.5'-deoxy Thymidine was effective against the activity of Bacillus subtilis and Staphylococcus aureus.	Hatano A , Nishimura M , Souta I . Impact of Unnatural Nucleosides on the Control of Microbial Growth[J]. Biocontrol Science, 2009, 14(2):55-60.	DMSO
18	1-Methylxanthine	N/A	6136-37-4	O=C1NC=2N=CNC2C(=O)N1C	C6H6N4O2	166.14	Metabolism	Endogenous Metabolite	Endogenous Metabolite; Human Endogenous Metabolite	1-Methylxanthine is a caffeine derivative. 1-Methylxanthine is an essential human urinary metabolite of caffeine and theophylline (1,3-dimethylxanthine, TP). 1-Methylxanthine enhances the radiosensitivity of tumor cells.	Algharrawi KH, et al. Direct conversion of theophylline to 3-methylxanthine by metabolically engineered E. coli. Microb Cell Fact. 2015 Dec 21;14:203.;Youn H, et al. 1-Methylxanthine enhances the radiosensitivity of tumor cells. Int J Radiat Biol. 2009 Feb;85(2):167-74.	DMSO
19	β-N-methylamino-L-alanine hydrochloride	L-BMAA hydrochloride	16012-55-8	[C@H](CNC)(C(O)=O)N.Cl	C4H11ClN2O2	154.6	Others	Others	others	L-BMAA hydrochloride is a neurotoxin produced by cyanobacteria. L-BMAA hydrochloride could cause amyotrophic lateral sclerosis (ALS) and possibly other neurodegenerative diseases.	Cox PA, et, al. BMAA and Neurodegenerative Illness. Neurotox Res. 2018 Jan; 33(1): 178-183.;Caller T, et, al. The Potential Role of BMAA in Neurodegeneration. Neurotox Res. 2018 Jan; 33(1): 222-226.	DMSO
20	α-Factor Mating Pheromone, yeast acetate	Mating Factor α acetate;α-Factor Mating Pheromone, yeast acetate(59401-28-4 free base)	TP1106L	CC(O)=O.CSCC[C@H](NC(=O)[C@@H]1CCCN1C(=O)[C@H](CCC(N)=O)NC(=O)CNC(=O)[C@@H]1CCCN1C(=O)[C@H](CCCCN)NC(=O)[C@H](CC(C)C)NC(=O)[C@H](CCC(N)=O)NC(=O)[C@H](CC(C)C)NC(=O)[C@H](Cc1c[nH]c2ccccc12)NC(=O)[C@H](Cc1c[nH]cn1)NC(=O)[C@@H](N)Cc1c[nH]c2ccccc12)C(=O)N[C@@H](Cc1ccc(O)cc1)C(O)=O	C84H118N20O19S	1744.05	Others	Others	Ste2p	α-Factor Mating Pheromone, yeast acetate is a peptide of 13 amino acids secreted by Saccharomyces cerevisiae α cells.	Naider F, et al. The alpha-factor mating pheromone of Saccharomyces cerevisiae: a model for studying the interaction of peptide hormones and G protein-coupled receptors. Peptides. 2004 Sep;25(9):1441-63.	DMSO
21	Pyridoxylamine	pyridoxamine	85-87-0	OC=1C(=NC=C(C1CN)CO)C	C8H12N2O2	168.19	Metabolism	Endogenous Metabolite	Human Endogenous Metabolite	Pyridoxylamine is an inhibitor of advanced glycation end production (AGEs) and lipoxidation end products (ALEs).	Stitt A, et al. The AGE inhibitor pyridoxamine inhibits development of retinopathy in experimental diabetes. Diabetes. 2002 Sep;51(9):2826-32.	DMSO
22	Methyl mycophenolate	Mycophenolic Acid Methyl Ester	31858-66-9	CC1=C2C(=C(O)C(C/C=C(/CCC(OC)=O)\C)=C1OC)C(=O)OC2	C18H22O6	334.36	Others	Others	Others	Methyl mycophenolate is found in the marine fungus Phaeosphaeria spartinae. Methyl mycophenolate is the methyl ester form of mycophenolic acid.	Gainer FE, et al. Thin-layer chromatography of mycophenolic acid and related compounds. J Chromatogr. 1971 Feb 3;54(3):446-8.;Elsebai MF. Secondary metabolites from the marine-derived fungus Phaeosphaeria spartinae. Nat Prod Res. 2019 Aug 23:1-6.	DMSO
23	3,4-Dimethylbenzoic acid	1-Carboxy-3,4-dimethylbenzene	619-04-5	O=C(O)C1=CC=C(C(=C1)C)C	C9H10O2	150.17	Others	Others	Others	3,4-Dimethylbenzoic acid is a product of dimethylbenzoate metabolism by Rhodococcus rhodochrous N75.	Stefan Schmidt, et al. Isolation and identification of two novel butenolides as products of dimethylbenzoate metabolism by	DMSO
24	Maduramicin ammonium	Maduramicin;Maduramycin Ammonium	84878-61-5	C[C@H]1C[C@H]([C@@](O[C@@H]1[C@H]2C[C@@H]([C@@H](O2)[C@@]3(CC[C@@H](O3)[C@@]4(CC[C@@]5(O4)C[C@@H]([C@H]([C@H](O5)[C@@H](C)[C@H]6[C@@H]([C@H]([C@@H]([C@](O6)(CC(=O)[O-])O)C)OC)OC)C)O)C)C)OC7C[C@@H]([C@H]([C@@H](O7)C)OC)OC)(C)O)C.[NH4+]	C47H83NO17	934.2	Apoptosis;Microbiology/Virology	Apoptosis;Antibacterial;Antibiotic	Antibiotic; Apoptosis; Bacterial	Maduramycin Ammonium is an anticoccidial agent for the the treatment of Eimeria spp., E. adenoeides, E. gallopavonis, and E. dispersa infection	Xiuge, Gao, Yani, et al. Maduramicin induces apoptosis in chicken myocardial cells via intrinsic and extrinsic pathways.[J]. Toxicology in Vitro An International Journal Published in Association with Bibra, 2018.;Mcdougald L R , Fuller A L , Mathis G F , et al. Efficacy of Maduramicin Ammonium against Coccidiosis in Turkeys under Laboratory and Floor-Pen Conditions[J]. Avian Diseases, 1990, 34(3)…	DMSO
25	Viridicatol	N/A	14484-44-7	O=C1NC=2C=CC=CC2C(C=3C=CC=C(O)C3)=C1O	C15H11NO3	253.25	Microbiology/Virology	Antifungal;Anti-infection	Anti-infection; Fungal	Viridicatol, with potent antibacterial activity against Staphylococcus aureus(MIC: 15.6 μg/mL), is isolated from the fermentation of an endophytic fungus Penicillium sp. R22 in Nerium indicum.	Ma YM, et al. A new isoquinolone alkaloid from an endophytic fungus R22 of Nerium indicum. Nat Prod Res. 2017 Apr;31(8):951-958.	DMSO
26	2′-O-Methyluridine	N/A	2140-76-3	CO[C@@H]1[C@H](O)[C@@H](CO)O[C@H]1n1ccc(=O)[nH]c1=O	C10H14N2O6	258.23	Others	Others	Others	2′-O-Methyluridine is a natural product that found in RNA such as rRNA, snRNA, snoRNA and tRNA in Archaea, Bacteria, and Eukaryota.	Aučynaitė A, et al. Identification of a 2'-O-Methyluridine Nucleoside Hydrolase Using the Metagenomic Libraries. Molecules. 2018;23(11):2904. Published 2018 Nov 7.	DMSO
27	Phenazine-1-carboxylic acid	N/A	2538-68-3	OC(=O)c1cccc2nc3ccccc3nc12	C13H8N2O2	224.219	Microbiology/Virology	Antifungal	Antifungal	Phenazine-1-carboxylic acid shows strong antifungal activity against all phytopathogenic fungi, inhibiting the fungal growth by about 90-100%. Phenazine-1-carboxylic acid could be used to compete with other phytopathogenic fungi that attack grapevine	Cimmino A, et al. Phenazine-1-Carboxylic Acid (PCA), Produced for the First Time as an Antifungal Metabolite by Truncatella angustata, a Causal Agent of Grapevine Trunk Diseases (GTDs) in Iran. J Agric Food Chem. 2021 Oct 20;69(41):12143-12147.	DMSO
28	Propiosyringone	N/A	5650-43-1	CCC(=O)c1cc(OC)c(O)c(OC)c1	C11H14O4	210.229	Others	Others	Others	Propiosyringone is from the degradation of Eucalyptus globulus wood by wood-rotting fungi.	J.C, del, Rı́o, et al. Py–GC/MS study of Eucalyptus globulus wood treated with different fungi[J]. Journal of Analytical and Applied Pyrolysis, 2001.	DMSO
29	Ganoderic acid B	N/A	81907-61-1	C[C@]12C3=C([C@]4(C)[C@@](C[C@@H]3O)(C(C)(C)[C@@H](O)CC4)[H])C(=O)C[C@]1(C)[C@@]([C@@H](CC(C[C@H](C(O)=O)C)=O)C)(CC2=O)[H]	C30H44O7	516.67	Angiogenesis;Chromatin/Epigenetic;Immunology/Inflammation;JAK/STAT signaling;Microbiology/Virology;Proteases/Proteasome;Stem Cells	IL Receptor;HIV Protease;STAT;JAK	HIV-1 protease; IL Receptor; JAK; STAT	Ganoderic acid B is a chemical marker in quality control of G. lucidum and related products. Ganoderic acid B acts as a telomerase inhibitor to inhibit the activation of Epstein-Barr virus (EBV) antigens. Ganoderic acid B is a moderate inhibitor of HIV-1 protease.	Zheng DS, et al. Triterpenoids from Ganoderma lucidum inhibit the activation of EBV antigens as telomerase inhibitors. Exp Ther Med. 2017 Oct;14(4):3273-3278.;Zhou S, et al. Triterpenes and Soluble Polysaccharide Changes in Lingzhi or Reishi Medicinal Mushroom, Ganoderma lucidum (Agaricomycetes), During Fruiting Growth. Int J Med Mushrooms. 2018;20(9):859-871.	DMSO
30	antcin A	N/A	163597-24-8	C[C@H](CCC(C(C)C(O)=O)=C)[C@@H](CC1)[C@@](C)(C2)[C@@H]1C(CC[C@@H]([C@@H]1C)[C@]3(C)CCC1=O)=C3C2=O	C29H42O4	454.64	Immunology/Inflammation;NF-Κb	NOD	NLRP3	antcin A is a steroid-like phytochemical isolated from the fruiting bodies of a precious edible mushroom Antrodia cinnamomea with strong anti-inflammatory and anti-tumor effects.	Kumar KJS, et al. Antcin-A Modulates Epithelial-to-Mesenchymal Transition and Inhibits Migratory and Invasive Potentials of Human Breast Cancer Cells via p53-Mediated miR-200c Activation. Planta Med. 2019 Jul;85(9-10):755-765.;Ruan S, et al. Antcin A alleviates pyroptosis and inflammatory response in Kupffercells of non-alcoholic fatty liver disease by targeting NLRP3. Int Immunopharmacol. 2021 N…	DMSO
31	3-Methyluridine	N/A	2140-69-4	O[C@H]1[C@@](O[C@H](CO)[C@H]1O)(N2C(=O)N(C)C(=O)C=C2)[H]	C10H14N2O6	258.23	Metabolism	Endogenous Metabolite	Human Endogenous Metabolite	3-Methyluridine is a modified RNA nucleoside of cellular RNA and commonly found in the form of RNA modifications.	1. Ranasinghe RT, et al. Detecting RNA base methylations in single cells by in situ hybridization. Nat Commun. 2018 Feb 13;9(1):655.	DMSO
32	Se-Methylselenocysteine	Se MSC;SeMSC;Se-MSC;SeMCys;MSeC	26046-90-2	[C@H](C[Se]C)(C(O)=O)N	C4H9NO2Se	182.08	Apoptosis;Proteases/Proteasome	Caspase;IAP;BCL	Bax; Caspase-3; IAP	Se-Methylselenocysteine is a potent chemopreventive agent in many test systems and has been shown to inhibit tumor promotion and induce apoptosis.	Avila FW, Yang Y, Faquin V, Ramos SJ, Guilherme LR, Thannhauser TW, Li L. Impact of selenium supply on Se-methylselenocysteine and glucosinolate accumulation in selenium-biofortified Brassica sprouts. Food Chem. 2014 Dec 15;165:578-86. doi: 10.1016/j.foodchem.2014.05.134. PubMed PMID: 25038715.;Yang H, Jia X. Safety evaluation of Se-methylselenocysteine as nutritional selenium supplement: acute t…	DMSO
33	2,3-Butanediol	N/A	513-85-9	OC(C)C(O)C	C4H10O2	90.12	Cytoskeletal Signaling;DNA Damage/DNA Repair;GPCR/G Protein;Metabolism;PI3K/Akt/mTOR signaling	PPAR;Cannabinoid Receptor;Akt;Endogenous Metabolite	Akt; CB1; Human Endogenous Metabolite; PPARγ	2,3-Butanediol is a butanediol derived from the bioconversion of natural resources which has great potential for diverse industries, including chemical, cosmetics, agriculture, and pharmaceutical areas.	Zhang L, et al. Mechanism of 2,3-butanediol stereoisomers formation in a newly isolated Serratia sp. T241. Sci Rep. 2016 Jan 12;6:19257.;Yang Z, Zhang Z. Recent advances on production of 2, 3-butanediol using engineered microbes. Biotechnol Adv. 2019 Jul-Aug;37(4):569-578.	DMSO
34	Oxychlororaphine	phenazine-1-carboxamide	550-89-0	O=C(N)C=1C=CC=C2N=C3C=CC=CC3=NC21	C13H9N3O	223.23	Microbiology/Virology	Antibacterial	S. aureus	Oxychlororaphine inhibits strongly the growth of Streptomyces sp. 441.	Anjaiah V, Cornelis P, Koedam N. Effect of genotype and root colonization in biological control of fusarium wilts in pigeonpea and chickpea by Pseudomonas aeruginosa PNA1. Can J Microbiol. 2003 Feb;49(2):85-91.;SIERRA G, VERINGA HA. Effect of oxychlororaphin on the growth in vitro of Streptomyces species and some pathogenic fungi. Nature. 1958 Jul 26;182(4630):265.	DMSO
35	Curvulin	N/A	19054-27-4	O=C(OCC)CC=1C=C(O)C=C(O)C1C(=O)C	C12H14O5	238.24	Cytoskeletal Signaling	Microtubule Associated	microtubule	Curvulin is the active metabolite isolated from Paraphoma sp. VIZR 1.46. Curvularin inhibits iNOS expression and microtubule assembly.	Ekaterina Poluektova, et al. Curvulin and Phaeosphaeride A From Paraphoma Sp. VIZR 1.46 Isolated From Cirsium arvense as Potential Herbicides. Molecules. 2018 Oct 28;23(11):2795.	DMSO
36	Urolithin C	N/A	165393-06-6	Oc1ccc2c(c1)oc(=O)c1cc(O)c(O)cc21	C13H8O5	244.202	Apoptosis;Immunology/Inflammation;Membrane transporter/Ion channel;Metabolism;NF-Κb;Tyrosine Kinase/Adaptors	Endogenous Metabolite;Reactive Oxygen Species;Calcium Channel;IGF-1R;Apoptosis	Apoptosis; Calcium Channel; Endogenous Metabolite; Insulin Receptor; Reactive Oxygen Species	Urolithin C is a gut metabolite of ellagic acid. Urolithin C induces apoptosis in PC12 cells through a mitochondria-mediated pathway.	Peipei Yin, et al. Urolithin C, a gut metabolite of ellagic acid, induces apoptosis in PC12 cells through a mitochondria-mediated pathway. RSC Advances. Issue 28, 2017.;Slimane Toubal, et al. Urolithin C Increases Glucose-Induced ERK Activation Which Contributes to Insulin Secretion. Fundam Clin Pharmacol. 2020 Feb 21.;Morgane Bayle, et al. Development and Validation of a Liquid Chromatography-El…	DMSO
37	Fervenulin	N/A	483-57-8	O=C1C2=NC=NN=C2N(C(=O)N1C)C	C7H7N5O2	193.16	Microbiology/Virology	Parasite	M. incognita	Fervenulin is isolated from a nematicidal actinomycete Streptomyces sp. CMU-MH021 has nematicidal activity. CMU-MH021 inhibits egg hatch(MICs: 30 μg/mL) and J2 mortality(MICs: 120 μg/mL) of M. incognita.	Ruanpanun P, et al. Nematicidal activity of Fervenulin isolated from a nematicidal actinomycete,	DMSO
38	Questiomycin A	N/A	1916-59-2	O=C1C=C2OC=3C=CC=CC3N=C2C=C1N	C12H8N2O2	212.2	Endocrinology/Hormones;GPCR/G Protein;Microbiology/Virology	GPR;Antibacterial	Antibacterial; GRP78	Questiomycin A is an antibiotic produced in crème fraiche with antibacterial and anticancer activities. Questiomycin A suppresses expression of GRP78, a cell-protective ER chaperone protein.	Gallo A, et al. Co-Occurrence of Regulated and Emerging Mycotoxins in Corn Silage: Relationships with Fermentation Quality and Bacterial Communities. Toxins (Basel). 2021 Mar 23;13(3):232.;Shimizu S, et al. Phenoxazine compounds produced by the reactions with bovine hemoglobin show antimicrobial activity against non-tuberculosis mycobacteria. Tohoku J Exp Med. 2004 May;203(1):47-52.;Che XF, et al…	DMSO
39	Gatifloxacin hydrochloride	BMS-206584 (hydrochloride);AM-1155 (hydrochloride);PD135432 (hydrochloride)	121577-32-0	Cl.COc1c(N2CCNC(C)C2)c(F)cc2c1n(cc(C(O)=O)c2=O)C1CC1	C19H23ClFN3O4	411.86	DNA Damage/DNA Repair;Microbiology/Virology	Topoisomerase;Antibacterial;Antibiotic	Antibiotic; Bacterial; Topoisomerase	Gatifloxacin hydrochloride is an antibiotic of the fourth-generation fluoroquinolone family, which can inhibit the bacterial enzyme DNA rotase and topoisomerase IV.	Jensen, H., et al., Comparison of ophthalmic gatifloxacin 0.3% and ciprofloxacin 0.3% in healing of corneal ulcers associated with Pseudomonas aeruginosa-induced ulcerative keratitis in rabbits. J Ocul Pharmacol Ther, 2005. 21(1): p. 36-43.;Fukuda, H., S. Hori, and K. Hiramatsu, Antibacterial activity of gatifloxacin (AM-1155, CG5501, BMS-206584), a newly developed fluoroquinolone, against sequen…	DMSO
40	Hydroxyphenyllactic acid	N/A	306-23-0	O=C(O)C(O)CC1=CC=C(O)C=C1	C9H10O4	182.17	Metabolism;Microbiology/Virology	Endogenous Metabolite;Antifungal	Fungal; Human Endogenous Metabolite	Hydroxyphenyllactic acid is an antifungal metabolite, fungi such as Lactobacillus sp. SK007.	Mu W, et al. Production of 4-hydroxyphenyllactic acid by Lactobacillus sp. SK007 fermentation. J Biosci Bioeng. 2010 Apr;109(4):369-71.	DMSO
41	Dihydrocyclosporin A	Dihydrocyclosporin-A	59865-15-5	[C@H]([C@@H](CCCC)C)(O)[C@@]1(N(C)C(=O)[C@H]([C@H](C)C)N(C)C(=O)[C@H](CC(C)C)N(C)C(=O)[C@H](CC(C)C)N(C)C(=O)[C@@H](C)NC(=O)[C@H](C)NC(=O)[C@H](CC(C)C)N(C)C(=O)[C@H]([C@@H](C)C)NC(=O)[C@H](CC(C)C)N(C)C(=O)CN(C)C(=O)[C@H](CC)NC1=O)[H]	C62H113N11O12	1204.63	Others	Others	Others	Dihydrocyclosporin A is closely related co-metabolite of cyclosporin A. Dihydrocyclosporin A significantly inhibits promastigotes and intracellular amastigotes.	Sanglier JJ, et al. Isolation of (4R)-4-[(E)-2-butenyl]-4-methyl-L-threonine, the characteristic structural element of cyclosporins, from a blocked mutant of Tolypocladium inflatum. J Antibiot (Tokyo). 1990 Jun;43(6):707-14.;Zheng ZW, et al. Evaluation of in vitro antileishmanial efficacy of cyclosporin A and its non-immunosuppressive derivative, dihydrocyclosporin A. Parasit Vectors. 2020 Feb 21…	DMSO
42	N-Acetyltyramine	N/A	1202-66-0	O=C(NCCC1=CC=C(O)C=C1)C	C10H13NO2	179.22	Microbiology/Virology	Antibacterial	Bacterial	N-Acetyltyramine is the active compound extracted from a fermentation broth of strain M3-10 which produces quorum-sensing inhibitor (QSI) compound. N-Acetyltyramine inhibits Chromobacterium violaceum ATCC 12472 violacein production and virulence factors, such as pyoverdine production, as well as swarming and twitching motilities, produced by Pseudomonas aeruginosa PAO1.	Reina JC, et al. A Quorum-Sensing Inhibitor Strain of Vibrio alginolyticus Blocks Qs-Controlled Phenotypes in Chromobacterium violaceum and Pseudomonas aeruginosa. Mar Drugs. 2019;17(9):494. Published 2019 Aug 24.;Kunimoto S, et al. Reversal of resistance by N-acetyltyramine or N-acetyl-2-phenylethylamine in doxorubicin-resistant leukemia P388 cells. J Antibiot (Tokyo). 1987;40(11):1651-1652.	DMSO
43	α-Zearalenol	N/A	36455-72-8	OC1=C2C(=CC(O)=C1)/C=C/CCC[C@@H](O)CCC[C@H](C)OC2=O	C18H24O5	320.38	Endocrinology/Hormones	Estrogen Receptor/ERR	estrogen receptor	α-Zearalenol is one of the major metabolites of Zearalenone. α-Zearalenol has structural analogy to estrogen, thus α-Zearalenol can bind to estrogen receptors (ERs).	Marin DE, et al. Cytotoxic and inflammatory effects of individual and combined exposure of HepG2 cells to zearalenone and its metabolites. Naunyn Schmiedebergs Arch Pharmacol. 2019 Aug;392(8):937-947.;Nittoli AC, et al. Effects of α-zearalenol on the metabolome of two breast cancer cell lines by 1H-NMR approach. Metabolomics. 2018 Feb 14;14(3):33.;.Tatay E, et al. Estrogenic activity of zearaleno…	DMSO
44	3-Nitropropanoic acid	Bovinocidin;3-NP;3-NP acid;β-Nitropropionic acid	504-88-1	OC(=O)CC[N+]([O-])=O	C3H5NO4	119.076	Apoptosis;Metabolism;Microbiology/Virology	Antibacterial;Dehydrogenase;Apoptosis	Apoptosis; Bacterial; Dehydrogenase	Bovinocidin is an irreversible inhibitor of succinate dehydrogenase.	Gupta S, Sharma B. Eur J Pharmacol. 2014 Jun 5;732:111-22.	DMSO
45	Simvastatin	MK-0733;MK 733	79902-63-9	CCC(C)(C)C(=O)O[C@H]1C[C@@H](C)C=C2C=C[C@H](C)[C@H](CC[C@@H]3C[C@@H](O)CC(=O)O3)[C@@H]12	C25H38O5	418.57	Apoptosis;Autophagy;Cell Cycle/Checkpoint;Metabolism	HMG-CoA Reductase;Mitophagy;Ferroptosis;Autophagy;Apoptosis	Apoptosis; Autophagy; Ferroptosis; HMG-CoA reductase; HMGCR; Mitophagy	Simvastatin is a HMG-CoA Reductase Inhibitor. The mechanism of action of simvastatin is as a Hydroxymethylglutaryl-CoA Reductase Inhibitor.	Kobayashi M, et al. Jpn J Pharmacol, 1989, 49(1), 125-133.;Slater EE, et al. Drugs. 1988, 36 Suppl 3, 72-82.;Wei Y H, Liao S L, Wang S H, et al. Simvastatin and ROCK Inhibitor Y-27632 Inhibit Myofibroblast Differentiation of Graves’ Ophthalmopathy-Derived Orbital Fibroblasts via RhoA-Mediated ERK and p38 Signaling Pathways[J]. Frontiers in Endocrinology. 2021, 11: 1109.;Leung BP, et al. J Immunol…	DMSO
46	Epothilone A	Epo A;epothile	152044-53-6	C[C@H]1CCC[C@H]2O[C@H]2C[C@H](OC(=O)C[C@H](O)C(C)(C)C(=O)[C@H](C)[C@H]1O)C(\C)=C\c1csc(C)n1	C26H39NO6S	493.66	Apoptosis;Cytoskeletal Signaling	Apoptosis;Microtubule Associated	Apoptosis; Microtubule/Tubulin; Tubulin	Epothilone A is a microtubule-stabilizing agent with EC0.01 of 2 μM.	Wang YL, et al. J Asian Nat Prod Res, 2009, 11(4), 357-364.;Bollag DM, et al. Cancer Res, 1995, 55(11), 2325-2333.;Nettles JH, et al. Science, 2004, 305(5685), 866-869.;Regueiro-Ren A , et al. Org Lett, 2001, 3(17), 2693-2696.;Swindell CS, et al. J Med Chem, 1991, 34(3), 1176-1184.	DMSO
47	Fumagillol	N/A	108102-51-8	COC1C(O)CCC2(CO2)C1[C@@]1(C)OC1CC=C(C)C	C16H26O4	282.38	Microbiology/Virology;Others	Antibacterial;Others	Bacterial	Fumagillol is a direct precursor of the potent angiogenesis inhibitors TNP-470 and fumagillin.	Antimicrob Agents Chemother. 2020 Sep 21;64(10):e00582-20. Janak Padia, Liudmila Kulakova, et al.Discovery and Preclinical Development of Antigiardiasis Fumagillol Derivatives.	DMSO
48	Aureobasidin A	N/A	127785-64-2	CCC(C)C(O)C(=O)N(C)[C@@H](C(C)C)C(=O)N[C@@H](Cc1ccccc1)C(=O)N(C)[C@@H](Cc1ccccc1)C(=O)N1CCC[C@H]1C(=O)N[C@@H]([C@H](C)CC)C(=O)N(C)[C@@H](C(C)C)C(=O)N[C@@H](CC(C)C)C(=O)N(C)[C@@]1(OC1=O)C(C)(C)O	C60H92N8O12	1117.44	Microbiology/Virology;Others	Others;Antifungal	AUR1; Fungal	Aureobasidin A is a cyclic peptide and an antifungal antibiotic. Aureobasidin A is an inhibitor of the inositolphosphorylceramide synthase AUR1.	Munusamy, Komathy , J. Vadivelu , and S. T. Tay . "A study on Candida biofilm growth characteristics and its susceptibility to aureobasidin A." Revista Iberoamericana De Micología (2018):S1130140617301158.	DMSO
49	Valinomycin	NSC 122023	2001-95-8	[C@@H](C)(C)[C@@H]1C(=O)N[C@H]([C@H](C)C)C(=O)O[C@@H](C)C(=O)N[C@@H](C(C)C)C(=O)O[C@H]([C@@H](C)C)C(=O)N[C@H]([C@@H](C)C)C(=O)O[C@@H](C)C(=O)N[C@@H](C(C)C)C(=O)O[C@H]([C@@H](C)C)C(=O)N[C@H]([C@@H](C)C)C(=O)O[C@@H](C)C(=O)N[C@@H](C(C)C)C(=O)O1	C54H90N6O18	1111.32	Apoptosis;Autophagy;Microbiology/Virology;PI3K/Akt/mTOR signaling	Antibiotic;Antibacterial;Apoptosis;Autophagy;PTEN	Antibiotic; Apoptosis; Autophagy; Bacterial; PTEN-induced kinase 1 (PINK1)	Valinomycin is a cyclic depsipeptide antibiotic and a potassium-specific ionophore.Valinomycin induces PINK1 activation and promotes Parkin phosphorylation at Ser65.	Kroteń MA, Bartoszewicz M, Swiecicka I. Cereulide and valinomycin, two important natural dodecadepsipeptides with ionophoretic activities. Pol J Microbiol. 2010;59(1):3-10.;Abdalah R1, Wei L, Francis K, Yu SP. Valinomycin-induced apoptosis in Chinese hamster ovary cells. Neurosci Lett. 2006 Sep 11;405(1-2):68-73. Epub 2006 Jul 20.;Kondapalli C, et al. PINK1 is activated by mitochondrial membrane …	DMSO
50	Colistin sulfate	Polymyxin E Sulfate;Polymixin E Sulfate;Colistin sulfate (1066-17-7 free base)	1264-72-8	OS(O)(=O)=O.CCC(C)CCCC(=O)N[C@@H](CCN)C(=O)N[C@@H]([C@@H](C)O)C(=O)N[C@@H](CCN)C(=O)N[C@H]1CCNC(=O)[C@@H](NC(=O)[C@H](CCN)NC(=O)[C@H](CCN)NC(=O)[C@H](CC(C)C)NC(=O)[C@@H](CC(C)C)NC(=O)[C@H](CCN)NC1=O)[C@@H](C)O	C52H100N16O17S	1253.53	Autophagy;Immunology/Inflammation;Microbiology/Virology	Autophagy;Antibiotic;Cell wall;Antibacterial	Antibiotic; Autophagy; Bacterial; cell wall	Colistin is a cyclic polypeptide antibiotic from Bacillus colistinus, composed of Polymyxins E1 and E2.	Evans ME, et al. Ann Pharmacother, 1999, 33(9), 960-967.;Lin B, et al. J Vet Pharmacol Ther, 2005, 28(4), 349-354.;Falagas ME, et al. Clin Infect Dis, 2005, 40(9), 1333-1341.;Ozbek B, et al. Chemotherapy, 2010, 56(6), 466-471.	Water
51	Neomycin sulfate	Framycin sulfate	1405-10-3	OS(O)(=O)=O.OS(O)(=O)=O.OS(O)(=O)=O.NC[C@@H]1O[C@H](O[C@@H]2[C@@H](CO)O[C@@H](O[C@@H]3[C@@H](O)[C@H](N)C[C@H](N)[C@H]3O[C@H]3O[C@H](CN)[C@@H](O)[C@H](O)[C@H]3N)[C@@H]2O)[C@H](N)[C@@H](O)[C@@H]1O	C23H52N6O25S3	908.87	Metabolism;Microbiology/Virology	Antibacterial;Phospholipase;ribosome;Antibiotic	30S ribosome; Antibiotic; Bacterial; Phospholipase	Neomycin is a broad spectrum aminoglycoside antibiotic whose current use is limited to oral and topical administration.	Arya DP, et al. J Am Chem Soc,2003, 125(13), 3733-3744.;Mead F, et al. Biophys J,2002, 82(4), 1953-1963.;Wang S, et al. Biochemistry,1998, 37(16), 5549-5557.;Stage TK, et al. RNA, 1995,(1), 95-101.	Water
52	G-418 disulfate	G418 Sulfate;Geneticin;Geneticin sulfate;Antibiotic G-418 sulfate	108321-42-2	OS(O)(=O)=O.OS(O)(=O)=O.CN[C@@H]1[C@@H](O)[C@@H](O[C@H]2[C@H](N)C[C@H](N)[C@@H](O[C@H]3O[C@H]([C@@H](C)O)[C@@H](O)[C@H](O)[C@H]3N)[C@@H]2O)OC[C@]1(C)O	C20H44N4O18S2	692.7	Microbiology/Virology	Antibacterial;Antibiotic	Antibiotic; Bacterial	G-418 (disulfate) is an aminoglycoside antibiotic, which blocks polypeptide synthesis by inhibiting the elongation step in both prokaryotic and eukaryotic cells.	Davies J, et al. Am J Trop Med Hyg, 1980, 29(5 Suppl), 1089-1092;Li Y, et al. World J Gastroenterol, 2003, 9(10), 2174-2177.;Shao C S, Zhou X H, Miao Y H, et al. In-situ observation of mitochondrial biogenesis as the early event of apoptosis[J]. bioRxiv. 2021: 2020.08. 23.263152.;Murphy NB, et al. Antimicrob Agents Chemother, 1993, 37(5), 1167-1170.	Water
53	Paromomycin Sulfate	Aminosidine sulfate;Paromomycin sulfate salt	1263-89-4	OS(O)(=O)=O.NC[C@@H]1O[C@H](O[C@@H]2[C@@H](CO)O[C@@H](O[C@@H]3[C@@H](O)[C@H](N)C[C@H](N)[C@H]3O[C@H]3O[C@H](CO)[C@@H](O)[C@H](O)[C@H]3N)[C@@H]2O)[C@H](N)[C@@H](O)[C@@H]1O	C23H47N5O18S	713.71	Microbiology/Virology	Antibacterial;Antibiotic;Parasite	16S rRNA; Antibiotic; Bacterial; Parasite	Paromomycin binds specifically to the RNA oligonucleotide at the A site of bacterial 30S ribosomes, thereby causing misreading and premature termination of translation of mRNA and inhibition of protein synthesis followed by cell death. Paromomycin Sulfate is the sulfate salt form of paromomycin, a structural derivative of neomycin, an aminoglycoside antibiotic with amebicidal and bactericidal eff…	Simon L. Croft, et al. Clin Microbiol Rev, 2006, 19(1), 111-126;Li Zhu, Ruonan Liu, Tangrong Liu, Xuan Zou, Zhe Xu, Huashi Guan. A novel strategy to screen inhibitors of multiple aminoglycoside-modifying enzymes with ultra-high performance liquid chromatography-quadrupole-time-of-flight mass spectrometry[J]. Journal of Pharmaceutical and Biomedical Analysis. 2019 Feb 5;164:520-527.;Davidson RN, e…	Water
54	Ectoine	L-Ectoine;THP(B)	96702-03-3	CC1=NCC[C@H](N1)C(O)=O	C6H10N2O2	142.158	Microbiology/Virology;Others	Others;Antibacterial	Bacterial	Ectoine is an osmoprotectant in a variety of microorganisms including halophilic and heterotrophic bacteria and non-halophilic bacteria such as the Streptomyces species, as well as E.coli.	Bownik A., et al. Ectoine as a promising protective agent in humans and animals.Arh Hig Rada Toksikol. 2016 Dec 1;67(4):260-265.;Meyer S., et al. Ectoine can enhance structural changes in DN/A in vitro. Sci Rep. 2017 Aug 3;7(1):7170.	Water
55	Esafosfan trisodium	Diphosphofructose trisodium;Fosfructose trisodium;FDP trisodium;D-Fructose-1,6-diphosphate trisodium salt octahydrate	38099-82-0	[Na+].[Na+].[Na+].OC(COP([O-])([O-])=O)C(O)C(O)C(=O)COP(O)([O-])=O	C6H11Na3O12P2	406.059	Metabolism;Others	Others;Endogenous Metabolite	Endogenous Metabolite	Fosfructose trisodium is a cytoprotective natural sugar phosphate for the potential treatment of sickle cell anemia, cardiovascular ischemia and asthma. It acts by stimulating anaerobic glycolysis which generates adenosine triphosphate under ischemic conditions.	Folkesson HG, et al. Fosfructose (Questcor). IDrugs. 2001 Dec;4(12):1401-7.	Water
56	Toyocamycin	Vengicide	606-58-6	O[C@H]1[C@@H](O[C@H](CO)[C@H]1O)N2C3=C(C(N)=NC=N3)C(C#N)=C2	C12H13N5O4	291.26	Apoptosis; Cell Cycle/Checkpoint; Microbiology/virology	Antibiotic; Antifungal; Apoptosis; IRE1	Antibiotic; Apoptosis; Fungal; IRE1; XBP1	Toyocamycin is an adenosine analog produced by Actinomycete, acts as an XBP1 inhibitor, inhibits IRE1α-induced ATP-dependent XBP1 mRNA cleavage (IC50: 80 nM). Toyocamycin induces apoptosis.	1. Toyocamycin, et al. Identification of Toyocamycin, an agent cytotoxic for multiple myeloma cells, as a potent inhibitor of ER stress-induced XBP1 mRNA splicing. Blood Cancer J. 2012 Jul;2(7):e79.	DMSO
57	Nystatin	Stamycin	1400-61-9	C[C@H]1O[C@@H](O[C@@H]2C[C@@H]3O[C@@](O)(C[C@H](O)[C@H]3C(O)=O)C[C@@H](O)[C@H](O)CC[C@@H](O)C[C@@H](O)C[C@@H](O)CC(=O)O[C@@H](C)[C@H](C)[C@H](O)[C@@H](C)\C=C\C=C\CC\C=C\C=C\C=C\C=C\2)[C@@H](O)[C@@H](N)[C@@H]1O	C47H75NO17	926.1	Apoptosis; Microbiology/virology	Antibiotic; Antifungal; Apoptosis	Antibiotic; Antifungal; Apoptosis; Fungal	Nystatin is a topical and oral antifungal agent with activity against many species of yeast and candida albicans, which is used largely to treat skin and oropharyngeal candidiasis.	1. Ellepola AN, et al. Adhesion of oral Candida species to human buccal epithelial cells following brief exposure to nystatin. Oral Microbiol Immunol. 1999 Dec;14(6):358-63.	DMSO
58	Roseoflavin	N/A	51093-55-1	OC[C@H](O)[C@@H](O)[C@@H](O)CN(C(C=C(N(C)C)C(C)=C1)=C1N=C2C(N3)=O)C2=NC3=O	C18H23N5O6	405.41	Microbiology/virology	Antibacterial	B. subtilis	Roseoflavin, a chemical analog of FMN and riboflavin that has antimicrobial activity, can directly bind to FMN riboswitch aptamers and downregulate the expression of an FMN riboswitch-lacZ reporter gene in B. subtilis.	1. Landwehr W, et al. Taxonomic analyses of members of the Streptomyces cinnabarinus cluster, description of Streptomyces cinnabarigriseus sp. nov. and Streptomyces davaonensis sp. nov. Int J Syst Evol Microbiol. 2018 Jan;68(1):382-393.	DMSO
